# Supplementary material
Source: PubMed Central journal article supplement (PMC3034445)
Supplement: NIHMS255872-supplement-Supplemental_Data.pdf [file NIHMS255872-supplement-Supplemental_Data.pdf]

## Supplementary Materials for

### **Tryptophan Catabolism by Indoleamine 2,3-Dioxygenase 1 Alters the Balance of T<sub>H</sub>17 to Regulatory T Cells in HIV Disease**

David Favre, Jeff Mold, Peter W. Hunt, Bittoo Kanwar, P'ng Loke, Lillian Seu, Jason D. Barbour, Margaret M. Lowe, Anura Jayawardene, Francesca Aweeka, Yong Huang, Daniel C. Douek, Jason M. Brenchley, Jeffrey N. Martin, Frederick M. Hecht, Steven G. Deeks, Joseph M. McCune\*

\*To whom correspondence should be addressed. E-mail: mike.mccune@ucsf.edu

Published 19 May 2010, *Sci. Transl. Med.* **2**, 32ra36 (2010)  
DOI: 10.1126/scitranslmed.3000632

#### **The PDF file includes:**

- Fig. S1. Characterization of IDO up-regulation in mDCs from HIV<sup>+</sup> subjects.
- Fig. S2. IDO activity on mDCs in vitro with combined IL-17 and/or IL-1 $\beta$ -IL-6-TNF $\alpha$ .
- Fig. S3. Characterization of T<sub>H</sub>17 memory phenotype in PBMCs and in rectosigmoid biopsies.
- Fig. S4. IDO catabolites affect T<sub>H</sub>17 cells in PBMCs from healthy donors and HIV-infected subjects.
- Table S1. Individual characteristic of subjects.
- Table S2. Antibody panels for multiparameter flow cytometry.

## Supplementary Figures and Tables

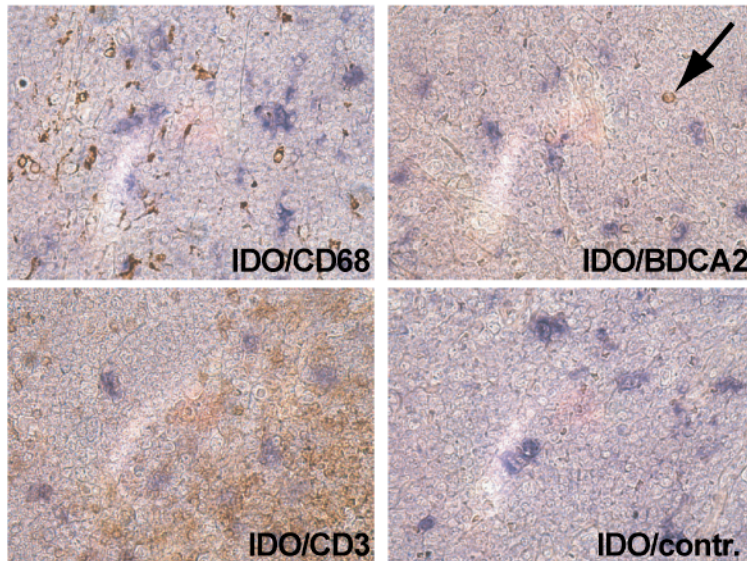

**Fig. S1. Characterization of IDO up-regulation in myeloid dendritic cells (mDCs) from HIV<sup>+</sup> subjects.** Detection of IDO expression by immunohistochemistry on paraffin-embedded section of lymph node from HIV-infected subjects, as described in Material and Methods, with co-staining of IDO (blue) and markers (brown) of macrophages (CD68), plasmacytoid DCs (BDCA2), and T cells (CD3). Anti-IDO rabbit polyclonal antibodies were detected using an anti-rabbit alkaline phosphatase antibody (Biocare Medical) and the substrate (nitro-blue tetrazolium chloride/5-bromo-4-chloro-3'-indolyphosphate p-toluidine, NBT/BCIP) (DAKO). Murine monoclonal antibodies (anti-CD68, clone KP-1; anti-BDCA2, clone 124b3.13; and anti-CD3, clone F7.2.38) were detected with a secondary anti-mouse antibody-horseradish peroxidase (HRP) (Biocare Medical) and the substrate, diaminobenzidine. IDO/control shows IDO staining and the secondary anti-mouse antibody-HRP reagent alone.

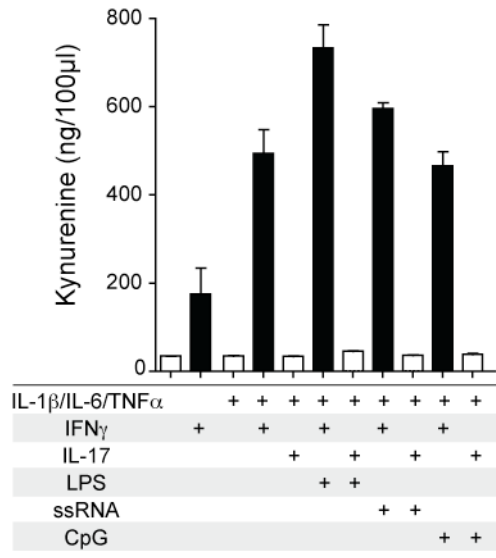

**Fig. S2. IDO activity on mDCs in vitro with combined IL-17 and/or IL-1β–IL-6–TNFα.** As described in Fig. 2C, IDO activity was measured in terms of kynurenine concentration described in the supernatant of monocyte-derived DCs after exposure to IFN<sub>γ</sub> and IL-1β, IL-6, and TNFα in combination with LPS or other TLR ligands (e.g., ssRNA and CpG). Data are representative of two donors.

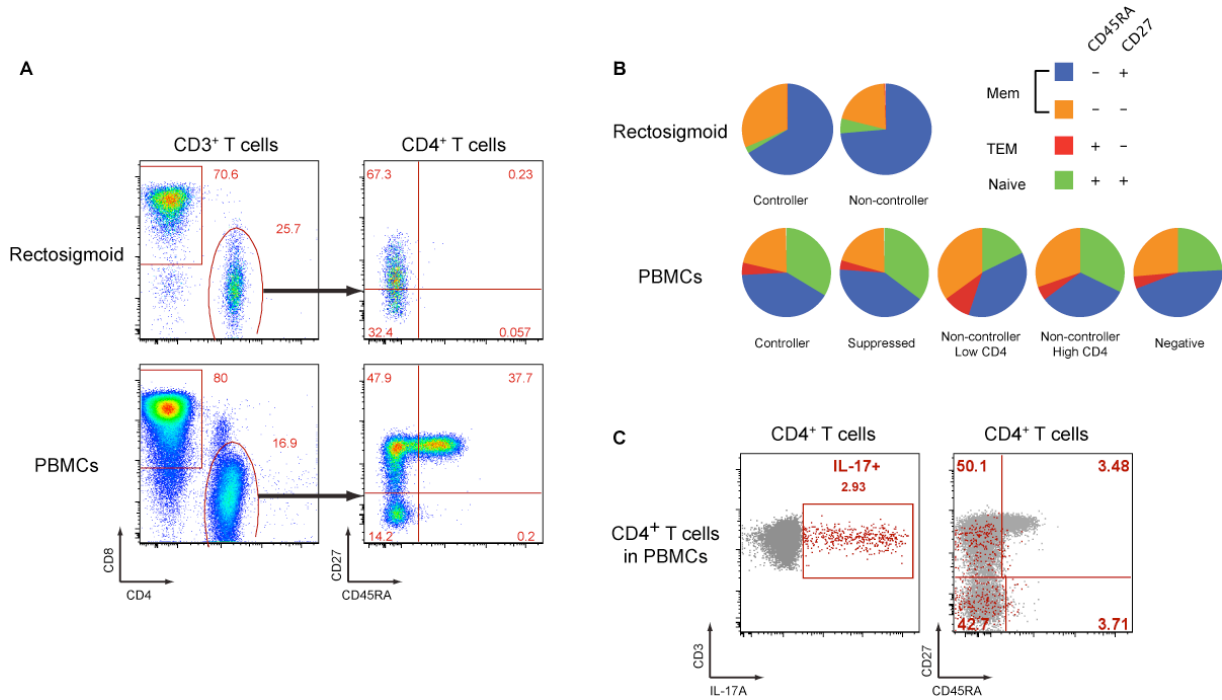

**Fig. S3. Characterization of  $T_H17$  memory phenotype in PBMCs and in rectosigmoid biopsies.**

(A) Representative FACS plot showing the distribution of naïve ( $CD45RA^+CD27^+$ ), memory (Mem) ( $CD45RA^-CD27^{+/-}$ ), and terminally differentiated effector memory (TEM) ( $CD45RA^+CD27^-$ ) subpopulations among  $CD4^+$  T cells in a rectosigmoid biopsy (upper) and in PBMCs (lower) from a HIV controller. (B) Pie-chart representations of the average mean frequencies of each of these subpopulations in rectosigmoid biopsies (upper) and in PBMCs (lower) in patients from Study D and B, respectively (for further details, see Materials and Methods, Patient populations, Study B and D, Table S1). (C) Overlay representation of  $IL-17^+$   $CD4^+$  T cells in  $CD4^+$  T cells. The frequency of  $Th17$  cells in total  $CD4$  T cells is indicated on the left panel. The right panel shows the overlay of  $Th17$  cells (red dot) on subset  $CD4^+$  T cells with the frequency of  $Th17$  cells indicated for each  $CD45$  and/or  $CD27$ .

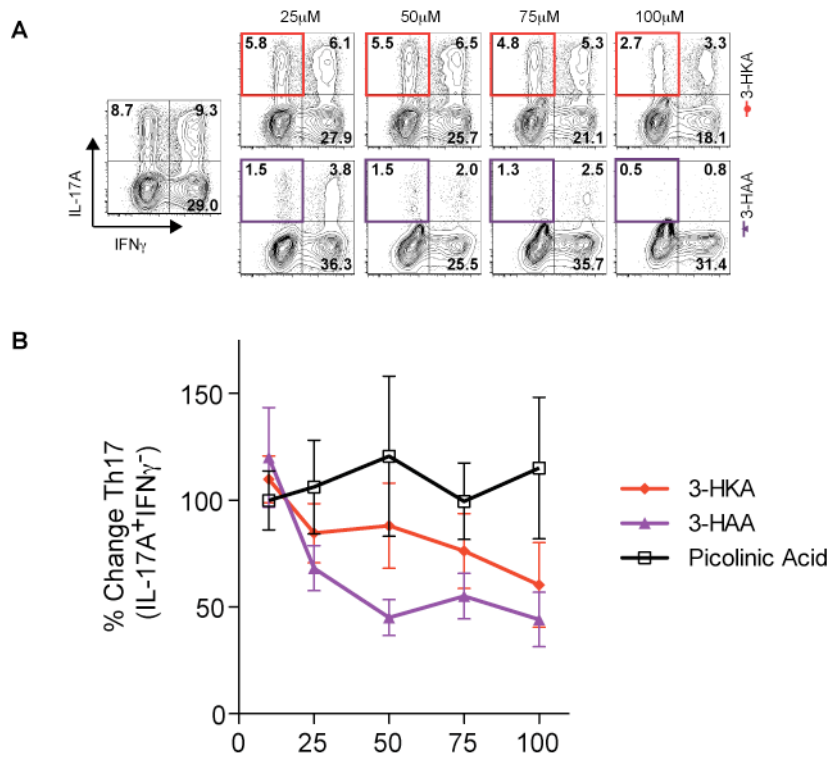

**Fig. S4. IDO catabolites affect  $T_H17$  cells in PBMCs from healthy donors and HIV-infected subjects.**

PBMCs from healthy subjects and untreated HIV-infected viral controllers were cultured *in vitro* for six days in the presence of different IDO catabolites, including 3-hydroxykynurenic acid (3-HKA), 3-hydroxyanthranilic acid (3-HAA), and picolinic acid (PA), as described in Fig. 5. **(A)** Frequency of  $IL-17A^+IFN\gamma^- CD4^+$  T cells from another healthy individual. **(B)** Change of Th17 over control, from three experiments from untreated HIV-infected controllers ( $N=4$ ), as described in Fig. 5.

**Table S1. Individual characteristic of subjects.** Median and [25%-75%] interquartile ranges are indicated on the top of each group. "Years of self-reported diagnosis" refers to the time between sampling of the specimens and the date of self-reported first positive antibody test. ARV: antiretroviral treatment.

| Study and Group                                                                      | Specimen Date | Gender             | Ethnicity        | MSM | HIV Ab   | Years of self-reported HIV Diagnosis (SCOPE) | Age (year at visit date) | Viral load (HIV RNA copies/ml) | CD4+ T cell count (cells/mm <sup>3</sup> ) | ARV Treatment |
|--------------------------------------------------------------------------------------|---------------|--------------------|------------------|-----|----------|----------------------------------------------|--------------------------|--------------------------------|--------------------------------------------|---------------|
| <b>Study A (n=86, SCOPE cohort)</b>                                                  |               |                    |                  |     |          |                                              |                          |                                |                                            |               |
|                                                                                      |               |                    |                  |     |          | Years                                        |                          |                                |                                            |               |
| <b>Controllers CD4&gt;500 (except 2 subjects CD4&gt;430 at specimen date) (n=20)</b> |               |                    |                  |     |          | 15 [11-17]                                   | 44 [43-51]               | 104 [75-607]                   | 669 [550-766]                              |               |
| SC-1                                                                                 | 2004          | Male               | Asian            | Yes | Positive | 20                                           | 57                       | 325                            | 663                                        | None          |
| SC-2                                                                                 | 2004          | M to F Transgender | African American | No  | Positive | 12                                           | 44                       | <75                            | 1 248                                      | None          |
| SC-3                                                                                 | 2004          | Male               | African American | No  | Positive | 18                                           | 41                       | 279                            | 675                                        | None          |
| SC-4                                                                                 | 2004          | Female             | African American | Yes | Positive | 16                                           | 48                       | <75                            | 1150                                       | None          |
| SC-5                                                                                 | 2004          | Female             | White            | Yes | Positive | 15                                           | 49                       | <75                            | 939                                        | None          |
| SC-6                                                                                 | 2003          | Male               | Hispanic/Latino  | Yes | Positive | 12                                           | 51                       | <75                            | 1 074                                      | None          |
| SC-7                                                                                 | 2005          | Male               | White            | Yes | Positive | 19                                           | 52                       | <75                            | 688                                        | None          |
| SC-8                                                                                 | 2001          | Male               | White            | Yes | Positive | 15                                           | 44                       | 1 523                          | 532                                        | None          |
| SC-9                                                                                 | 2005          | Male               | African American | No  | Positive | 15                                           | 51                       | <75                            | 556                                        | None          |
| SC-10                                                                                | 2005          | Male               | African American | Yes | Positive | 16                                           | 44                       | 888                            | 708                                        | None          |
| SC-11                                                                                | 2005          | Male               | African American | Yes | Positive | -                                            | 58                       | 1 356                          | 699                                        | None          |
| SC-12                                                                                | 2005          | Male               | White            | Yes | Positive | 13                                           | 42                       | 307                            | 480                                        | None          |
| SC-13                                                                                | 2004          | Male               | White            | Yes | Positive | 13                                           | 35                       | <75                            | 1 548                                      | None          |
| SC-14                                                                                | 2005          | Female             | African American | No  | Positive | 19                                           | 44                       | <75                            | 590                                        | None          |
| SC-15                                                                                | 2005          | Male               | African American | Yes | Positive | 18                                           | 50                       | <75                            | 649                                        | None          |
| SC-16                                                                                | 2004          | Female             | African American | Yes | Positive | 4                                            | 36                       |                                | 561                                        | None          |
| SC-17                                                                                | 2003          | Male               | African American | No  | Positive | 7                                            | 44                       | 1 843                          | 512                                        | None          |
| SC-18                                                                                | 2002          | Male               | White            | Yes | Positive | 6                                            | 53                       | 104                            | 507                                        | None          |
| SC-19                                                                                | 2002          | M to F Transgender | African American | Yes | Positive | 6                                            | 43                       | 191                            | 680                                        | None          |
| SC-20                                                                                | 2001          | Male               | White            | Yes | Positive | 9                                            | 43                       | 1 277                          | 434                                        | None          |
| <b>Noncontrollers CD4&gt;350 (n=33)</b>                                              |               |                    |                  |     |          | 11 [5-16]                                    | 44 [41-51]               | 17462 [7179-31913]             | 516 [440-636]                              |               |
| SC-21                                                                                | 2005          | Male               | White            | Yes | Positive | 18                                           | 55                       | 2 808                          | 1 137                                      | None          |
| SC-22                                                                                | 2003          | Male               | African American | Yes | Positive | 18                                           | 53                       | 4 001                          | 678                                        | None          |
| SC-23                                                                                | 2003          | Female             | African American | Yes | Positive | 17                                           | 51                       | 6 547                          | 648                                        | None          |
| SC-24                                                                                | 2002          | Male               | White            | Yes | Positive | 14                                           | 41                       | 3 513                          | 663                                        | None          |
| SC-25                                                                                | 2001          | Male               | African American | Yes | Positive | 11                                           | 33                       | 6 132                          | 511                                        | None          |
| SC-26                                                                                | 2004          | Male               | White            | Yes | Positive | 5                                            | 41                       | 7 179                          | 642                                        | None          |
| SC-27                                                                                | 2004          | Male               | African American | No  | Positive | 10                                           | 45                       | 5 152                          | 434                                        | None          |
| SC-28                                                                                | 2004          | Male               | African American | No  | Positive | 18                                           | 58                       | 2 557                          | 471                                        | None          |
| SC-29                                                                                | 2004          | Male               | Asian            | Yes | Positive | 18                                           | 44                       | 9 207                          | 396                                        | None          |
| SC-30                                                                                | 2005          | Male               | African American | Yes | Positive | 13                                           | 38                       | 3 284                          | 363                                        | None          |
| SC-31                                                                                | 2005          | Male               | White            | Yes | Positive | 18                                           | 60                       | 17 462                         | 636                                        | None          |
| SC-32                                                                                | 2005          | Male               | African American | Yes | Positive | 14                                           | 50                       | >100 000                       | 778                                        | None          |
| SC-33                                                                                | 2003          | Female             | White            | Yes | Positive | 6                                            | 42                       | 18 397                         | 543                                        | None          |
| SC-34                                                                                | 2002          | Male               | Asian            | Yes | Positive | 4                                            | 37                       | 32 077                         | 555                                        | None          |
| SC-35                                                                                | 2003          | Female             | White            | Yes | Positive | 16                                           | 46                       | 75 267                         | 559                                        | None          |
| SC-36                                                                                | 2002          | Male               | White            | Yes | Positive | 11                                           | 36                       | 16 006                         | 500                                        | None          |
| SC-37                                                                                | 2002          | Male               | White            | Yes | Positive | 10                                           | 46                       | >500 000                       | 514                                        | None          |
| SC-38                                                                                | 2002          | Male               | White            | Yes | Positive | 13                                           | 31                       | 63 932                         | 585                                        | None          |
| SC-39                                                                                | 2002          | Male               | Hispanic/Latino  | Yes | Positive | 2                                            | 51                       | 31 527                         | 501                                        | None          |
| SC-40                                                                                | 2001          | Male               | White            | Yes | Positive | 10                                           | 51                       | 111 838                        | 528                                        | None          |
| SC-41                                                                                | 2001          | Male               | White            | No  | Positive | 5                                            | 44                       | 14 249                         | 771                                        | None          |
| SC-42                                                                                | 2002          | M to F Transgender | White            | Yes | Positive | 11                                           | 31                       | 37 216                         | 536                                        | None          |
| SC-43                                                                                | 2001          | Male               | White            | Yes | Positive | 14                                           | 51                       | 30 181                         | 715                                        | None          |
| SC-44                                                                                | 2005          | Male               | African American | No  | Positive | 16                                           | 54                       | 12 305                         | 542                                        | None          |
| SC-45                                                                                | 2005          | Male               | White            | No  | Positive | 4                                            | 46                       | 22 012                         | 516                                        | None          |
| SC-46                                                                                | 2004          | Male               | White            | Yes | Positive | 4                                            | 38                       | 14 067                         | 489                                        | None          |
| SC-47                                                                                | 2004          | Female             | African American | Yes | Positive | 3                                            | 42                       | 17 784                         | 356                                        | None          |
| SC-48                                                                                | 2004          | Female             | White            | Yes | Positive | 12                                           | 44                       | 31 913                         | 423                                        | None          |
| SC-49                                                                                | 2003          | Male               | White            | Yes | Positive | 14                                           | 44                       | 13 640                         | 440                                        | None          |
| SC-50                                                                                | 2001          | Male               | African American | No  | Positive | 2                                            | 36                       | 44 773                         | 395                                        | None          |
| SC-51                                                                                | 2001          | Male               | Mixed Race       | Yes | Positive | 10                                           | 41                       | 25 941                         | 432                                        | None          |
| SC-52                                                                                | 2001          | Female             | African American | No  | Positive | 3                                            | 43                       | 27 890                         | 395                                        | None          |
| SC-53                                                                                | 2005          | Male               | White            | Yes | Positive | 19                                           | 41                       | 13 430                         | 477                                        | None          |
| <b>Noncontrollers CD4&lt;350 (n=33)</b>                                              |               |                    |                  |     |          | 13 [9-17]                                    | 43 [39-49]               | 27505 [16928-55059]            | 163 [128-258]                              |               |
| SC-141                                                                               | 2004          | Female             | White            | Yes | Positive | 18                                           | 52                       | 3 265                          | 276                                        | None          |
| SC-54                                                                                | 2004          | Male               | African American | Yes | Positive | 17                                           | 49                       | 5 655                          | 305                                        | None          |
| SC-55                                                                                | 2004          | M to F Transgender | African American | Yes | Positive | 12                                           | 39                       | 4 358                          | 346                                        | None          |
| SC-56                                                                                | 2004          | M to F Transgender | African American | Yes | Positive | 10                                           | 32                       | 6 418                          | 163                                        | None          |
| SC-57                                                                                | 2004          | Male               | White            | No  | Positive | 18                                           | 52                       | 9 127                          | 192                                        | None          |
| SC-58                                                                                | 2004          | Male               | African American | No  | Positive | 20                                           | 48                       | 17 330                         | 282                                        | None          |
| SC-59                                                                                | 2004          | Male               | White            | Yes | Positive | 4                                            | 36                       | 17 320                         | 246                                        | None          |
| SC-60                                                                                | 2004          | Male               | African American | No  | Positive | 9                                            | 39                       | 381 594                        | 219                                        | None          |
| SC-61                                                                                | 2002          | Male               | White            | Yes | Positive | 13                                           | 46                       | 13 011                         | 268                                        | None          |
| SC-62                                                                                | 2001          | Female             | Hispanic/Latino  | No  | Positive | 11                                           | 49                       | 23 075                         | 318                                        | None          |
| SC-63                                                                                | 2001          | Male               | Mixed Race       | Yes | Positive | 16                                           | 40                       | 57 103                         | 251                                        | None          |
| SC-64                                                                                | 2001          | Male               | Mixed Race       | Yes | Positive | 10                                           | 37                       | 24 631                         | 258                                        | None          |
| SC-65                                                                                | 2001          | Male               | White            | Yes | Positive | 12                                           | 47                       | 24 026                         | 293                                        | None          |
| SC-66                                                                                | 2005          | Female             | African American | Yes | Positive | 9                                            | 43                       | 34 864                         | 239                                        | None          |
| SC-67                                                                                | 2005          | Male               | White            | No  | Positive | 10                                           | 43                       | 15 750                         | 291                                        | None          |
| SC-68                                                                                | 2004          | Female             | African American | Yes | Positive | 7                                            | 45                       | 26 584                         | 161                                        | None          |
| SC-69                                                                                | 2004          | Male               | White            | Yes | Positive | 13                                           | 44                       | 54 377                         | 83                                         | None          |
| SC-70                                                                                | 2004          | Female             | White            | No  | Positive | 9                                            | 56                       | 119 817                        | 163                                        | None          |
| SC-71                                                                                | 2004          | Female             | African American | No  | Positive | 10                                           | 55                       | 13 188                         | 93                                         | None          |
| SC-72                                                                                | 2004          | Female             | African American | Yes | Positive | 13                                           | 38                       | 34 951                         | 31                                         | None          |
| SC-73                                                                                | 2003          | Female             | White            | Yes | Positive | 18                                           | 51                       | 400 865                        | 184                                        | None          |
| SC-74                                                                                | 2003          | Male               | Mixed Race       | No  | Positive | 4                                            | 42                       | 347 559                        | 65                                         | None          |
| SC-75                                                                                | 2002          | Female             | African American | Yes | Positive | 4                                            | 33                       | 28 425                         | 128                                        | None          |
| SC-76                                                                                | 2001          | Male               | African American | Yes | Positive | 14                                           | 39                       | 24 201                         | 83                                         | None          |
| SC-77                                                                                | 2001          | Male               | White            | Yes | Positive | 8                                            | 43                       | >500 000                       | 120                                        | None          |
| SC-78                                                                                | 2002          | Male               | Mixed Race       | Yes | Positive | 16                                           | 52                       | 28 998                         | 86                                         | None          |
| SC-79                                                                                | 2002          | Male               | White            | Yes | Positive | 18                                           | 42                       | 277 359                        | 153                                        | None          |
| SC-80                                                                                | 2001          | Female             | African American | No  | Positive | 13                                           | 51                       | 36 667                         | 134                                        | None          |
| SC-81                                                                                | 2001          | Male               | White            | Yes | Positive | 13                                           | 48                       | 51 252                         | 152                                        | None          |
| SC-82                                                                                | 2001          | Male               | White            | No  | Positive | 17                                           | 34                       | 21 526                         | 163                                        | None          |
| SC-83                                                                                | 2001          | Male               | White            | Yes | Positive | 9                                            | 43                       | 87 283                         | 57                                         | None          |
| SC-84                                                                                | 2005          | Male               | White            | Yes | Positive | 17                                           | 39                       |                                | 156                                        | None          |
| SC-85                                                                                | 2005          | Male               | Native American  | No  | Positive | 19                                           | 45                       | 32 665                         | 191                                        | None          |

| Study and Group                         | Specimen Date | Gender             | Ethnicity        | MSM | HIV Ab   | Years of self-reported HIV Diagnosis (SCOPE) | Age (year at visit date) | Viral load (HIV RNA copies/ml) | CD4+ T cell count (cells/mm <sup>3</sup> ) | ARV Treatment       |
|-----------------------------------------|---------------|--------------------|------------------|-----|----------|----------------------------------------------|--------------------------|--------------------------------|--------------------------------------------|---------------------|
| <b>Study B (n=70, SCOPE cohort)</b>     |               |                    |                  |     |          |                                              |                          |                                |                                            |                     |
| <b>Controllers CD4&gt;500 (n=14)</b>    |               |                    |                  |     |          | 15 [14-18]                                   | 49 [44-51]               | 75 [75-75]                     | 814 [713-1156]                             |                     |
| SC-86                                   | 2005          | Female             | Hispanic/Latino  | No  | Positive | 16                                           | 45                       | <75                            | 1482                                       | None                |
| SC-87                                   | 2006          | Female             | African American | No  | Positive | 10                                           | 54                       | <75                            | 821                                        | None                |
| SC-11                                   | 2006          | Male               | African American | Yes | Positive | 15                                           | 59                       | 122                            | 671                                        | None                |
| SC-88                                   | 2006          | M to F Transgender | African American | Yes | Positive | 17                                           | 51                       | 1 288                          | 1181                                       | None                |
| SC-89                                   | 2006          | Male               | African American | Yes | Positive | 18                                           | 47                       | <75                            | 806                                        | None                |
| SC-90                                   | 2006          | Male               | African American | Yes | Positive | 13                                           | 50                       | 940                            | 788                                        | None                |
| SC-3                                    | 2004          | Male               | African American | No  | Positive | 17                                           | 40                       | <75                            | 893                                        | None                |
| SC-91                                   | 2004          | Male               | White            | Yes | Positive | 23                                           | 44                       | <75                            | 682                                        | None                |
| SC-92                                   | 2004          | Female             | African American | No  | Positive | 14                                           | 51                       | <75                            | 1081                                       | None                |
| SC-13                                   | 2004          | Male               | White            | Yes | Positive | 13                                           | 35                       | <75                            | 1548                                       | None                |
| SC-14                                   | 2005          | Female             | African American | No  | Positive | 19                                           | 44                       | <75                            | 590                                        | None                |
| SC-9                                    | 2005          | Male               | African American | No  | Positive | 15                                           | 50                       | <75                            | 805                                        | None                |
| SC-7                                    | 2005          | Male               | White            | No  | Positive | 19                                           | 52                       | <75                            | 688                                        | None                |
| SC-2                                    | 2006          | M to F Transgender | African American | Yes | Positive | 15                                           | 46                       | <75                            | 1224                                       | None                |
| <b>Suppressed (n=14)</b>                |               |                    |                  |     |          | 16 [11-21]                                   | 51 [42-55]               | 75 [75-75]                     | 720 [658-830]                              |                     |
| SC-93                                   | 2003          | Male               | Pacific Islander | Yes | Positive | 14                                           | 46                       | <75                            | 906                                        | AZT/3TC,EFV,LPV/r   |
| SC-94                                   | 2004          | Male               | White            | Yes | Positive | 11                                           | 53                       | <75                            | 1052                                       | ABC,TDF,EFV         |
| SC-95                                   | 2004          | Male               | African American | Yes | Positive | 22                                           | 40                       | <75                            | 742                                        | D4T,3TC,NVP,NFV     |
| SC-96                                   | 2004          | Male               | Asian            | No  | Positive | 15                                           | 51                       | <75                            | 539                                        | 3TC,TDF,NFV         |
| SC-97                                   | 2004          | Male               | White            | Yes | Positive | 11                                           | 40                       | <75                            | 1109                                       | AZT/3TC,ABC,EFV     |
| SC-98                                   | 2005          | Male               | White            | Yes | Positive | 18                                           | 60                       | <75                            | 742                                        | AZT/3TC,NVP,IDV,RTV |
| SC-99                                   | 2005          | Male               | White            | Yes | Positive | 22                                           | 56                       | <75                            | 675                                        | ABC,3TC,NVP,LPV/r   |
| SC-100                                  | 2005          | Female             | White            | No  | Positive | 12                                           | 42                       | <75                            | 653                                        | ABC,NVP,LPV/r       |
| SC-101                                  | 2005          | Male               | Mixed            | Yes | Positive | 8                                            | 40                       | <75                            | 859                                        | 3TC,TDF,NVP,LPV/r   |
| SC-102                                  | 2005          | Male               | White            | Yes | Positive | 23                                           | 51                       | <75                            | 723                                        | DDI,TDF,EFV,LPV/r   |
| SC-103                                  | 2005          | Male               | White            | Yes | Positive | 19                                           | 57                       | <75                            | 717                                        | AZT,TDF,ABC/3TC     |
| SC-104                                  | 2005          | Male               | White            | Yes | Positive | 17                                           | 43                       | <75                            | 672                                        | ABC,3TC,NVP,LPV/r   |
| SC-105                                  | 2006          | Male               | White            | Yes | Positive | 28                                           | 51                       | <75                            | 460                                        | ABC/3TC,ATV,RTV     |
| SC-106                                  | 2006          | Male               | White            | Yes | Positive | 11                                           | 56                       | <75                            | 424                                        | 3TC,TDF,IDV         |
| <b>Noncontrollers CD4&gt;350 (n=14)</b> |               |                    |                  |     |          | 8 [3-15]                                     | 43 [37-47]               | 33921 [26527-52955]            | 504 [473-541]                              |                     |
| SC-50                                   | 2001          | Male               | African American | No  | Positive | 2                                            | 35                       | 260 744                        | 506                                        | None                |
| SC-42                                   | 2002          | M to F Transgender | White            | No  | Positive | 11                                           | 31                       | 37 216                         | 536                                        | None                |
| SC-34                                   | 2002          | Male               | Asian            | Yes | Positive | 3                                            | 36                       | 148 248                        | 572                                        | None                |
| SC-38                                   | 2002          | Male               | White            | Yes | Positive | 13                                           | 30                       | 54 819                         | 938                                        | None                |
| SC-23                                   | 2002          | Female             | African American | No  | Positive | 16                                           | 49                       | 12 136                         | 585                                        | None                |
| SC-107                                  | 2002          | Male               | African American | Yes | Positive | 9                                            | 53                       | 323 995                        | 391                                        | None                |
| SC-26                                   | 2004          | Male               | White            | Yes | Positive | 5                                            | 40                       | 23 739                         | 499                                        | None                |
| SC-35                                   | 2003          | Female             | White            | No  | Positive | 16                                           | 46                       | 36 563                         | 543                                        | None                |
| SC-29                                   | 2003          | Male               | Asian            | Yes | Positive | 18                                           | 43                       | 26 924                         | 418                                        | None                |
| SC-47                                   | 2004          | Female             | African American | Yes | Positive | 3                                            | 41                       | 27 976                         | 490                                        | None                |
| SC-45                                   | 2004          | Male               | White            | No  | Positive | 3                                            | 44                       | 26 394                         | 501                                        | None                |
| SC-39                                   | 2003          | Male               | Hispanic/Latino  | Yes | Positive | 3                                            | 52                       | 25 655                         | 438                                        | None                |
| SC-33                                   | 2004          | Female             | White            | Yes | Positive | 7                                            | 42                       | 47 363                         | 510                                        | None                |
| SC-8                                    | 2005          | Male               | White            | Yes | Positive | 19                                           | 47                       | 31 279                         | 467                                        | None                |
| <b>Noncontrollers CD4&lt;350 (n=14)</b> |               |                    |                  |     |          | 13 [10-16]                                   | 41 [38-44]               | 45369 [17423-139048]           | 218 [179-260]                              |                     |
| SC-108                                  | 2000          | Male               | White            | Yes | Positive | 10                                           | 44                       | 50 169                         | 264                                        | None                |
| SC-81                                   | 2000          | Male               | White            | Yes | Positive | 13                                           | 47                       | 22 762                         | 268                                        | None                |
| SC-109                                  | 2001          | Male               | African American | No  | Positive | 10                                           | 60                       | 11 137                         | 222                                        | None                |
| SC-64                                   | 2001          | Male               | Mixed            | Yes | Positive | 9                                            | 37                       | 24 631                         | 258                                        | None                |
| SC-82                                   | 2001          | Male               | White            | Yes | Positive | 17                                           | 33                       | 12 585                         | 184                                        | None                |
| SC-110                                  | 2001          | Male               | African American | Yes | Positive | 14                                           | 44                       | 265 548                        | 201                                        | None                |
| SC-77                                   | 2001          | Male               | White            | Yes | Positive | 8                                            | 42                       | 347 127                        | 147                                        | None                |
| SC-61                                   | 2001          | Male               | White            | Yes | Positive | 12                                           | 44                       | 15 643                         | 239                                        | None                |
| SC-36                                   | 2003          | Male               | White            | Yes | Positive | 13                                           | 37                       | 40 569                         | 325                                        | None                |
| SC-111                                  | 2003          | Male               | White            | Yes | Positive | 19                                           | 40                       | 53 585                         | 214                                        | None                |
| SC-43                                   | 2004          | Male               | White            | Yes | Positive | 17                                           | 53                       | 402 295                        | 177                                        | None                |
| SC-60                                   | 2004          | Male               | African American | No  | Positive | 9                                            | 39                       | 151 896                        | 163                                        | None                |
| SC-56                                   | 2005          | M to F Transgender | African American | Yes | Positive | 11                                           | 32                       | 13 283                         | 261                                        | None                |
| SC-84                                   | 2005          | Male               | White            | Yes | Positive | 17                                           | 39                       | 100 502                        | 176                                        | None                |
| <b>Neg (n=14)</b>                       |               |                    |                  |     |          |                                              | 35 [30-44]               |                                |                                            |                     |
| SC-112                                  | 2003          | Male               | White            | Yes | Negative | -                                            | 33                       | -                              | ND                                         | -                   |
| SC-113                                  | 2003          | Male               | White            | Yes | Negative | -                                            | 29                       | -                              | ND                                         | -                   |
| SC-114                                  | 2003          | Male               | Mixed            | Yes | Negative | -                                            | 23                       | -                              | ND                                         | -                   |
| SC-115                                  | 2003          | Male               | White            | Yes | Negative | -                                            | 49                       | -                              | ND                                         | -                   |
| SC-116                                  | 2003          | Male               | White            | Yes | Negative | -                                            | 41                       | -                              | ND                                         | -                   |
| SC-117                                  | 2003          | Male               | White            | Yes | Negative | -                                            | 45                       | -                              | ND                                         | -                   |
| SC-118                                  | 2003          | Male               | White            | Yes | Negative | -                                            | 45                       | -                              | ND                                         | -                   |
| SC-119                                  | 2003          | Male               | White            | Yes | Negative | -                                            | 57                       | -                              | ND                                         | -                   |
| SC-120                                  | 2003          | Male               | White            | Yes | Negative | -                                            | 27                       | -                              | ND                                         | -                   |
| SC-121                                  | 2003          | Male               | White            | Yes | Negative | -                                            | 37                       | -                              | ND                                         | -                   |
| SC-122                                  | 2003          | Male               | White            | Yes | Negative | -                                            | 32                       | -                              | ND                                         | -                   |
| SC-123                                  | 2003          | Male               | Hispanic/Latino  | Yes | Negative | -                                            | 31                       | -                              | ND                                         | -                   |
| SC-124                                  | 2003          | Male               | White            | Yes | Negative | -                                            | 42                       | -                              | ND                                         | -                   |
| SC-125                                  | 2003          | Male               | White            | Yes | Negative | -                                            | 24                       | -                              | ND                                         | -                   |

| Study and Group                       | Specimen Date | Gender             | Ethnicity         | MSM | HIV Ab   | Months from estimated infection date (EID) | Age (year at visit date) | Viral load (HIV RNA copies/ml) | CD4+ T cell count (cells/mm <sup>3</sup> ) | ARV Treatment |
|---------------------------------------|---------------|--------------------|-------------------|-----|----------|--------------------------------------------|--------------------------|--------------------------------|--------------------------------------------|---------------|
| <b>Study C (n=27, Options cohort)</b> |               |                    |                   |     |          |                                            |                          |                                |                                            |               |
| <b>ACUTE</b>                          |               |                    |                   |     |          | 3 [2.4-3.6]                                | 36 [34-42.5]             | 14147 [2824-56377]             | 552 [494-728]                              |               |
| <b>Group-1 (Early, n=9)</b>           |               |                    |                   |     |          | 3.4 [2.6-4.2]                              | 36 [35-40]               | 3269 [1351-8856]               | 675 [534-756]                              | None          |
| OP-1                                  | 1998          | Male               | AfricanAmerican   | Yes | Positive | 5.2                                        | 43                       | 1 351                          |                                            | None          |
| OP-2                                  | 2000          | Male               | Mixed Race        | Yes | Positive | 2.6                                        | 38                       | 1 770                          |                                            | None          |
| OP-3                                  | 2000          | Male               | White             | Yes | Positive | 2.4                                        | 35                       | 3 634                          | 504                                        | None          |
| OP-4                                  | 2000          | Male               | Mixed Race        | Yes | Positive | 2.4                                        | 36                       | 3 269                          | 675                                        | None          |
| OP-5                                  | 2000          | Male               | White             | Yes | Positive | 3.7                                        | 40                       | 50                             | 527                                        | None          |
| OP-6                                  | 2000          | Male               | White             | Yes | Positive | 3.4                                        | 31                       | 14 147                         | 784                                        | None          |
| OP-7                                  | 2001          | Male               | White             | Yes | Positive | 3.1                                        | 28                       | 8 856                          | 966                                        | None          |
| OP-8                                  | 2001          | Male               | White             | Yes | Positive | 4.2                                        | 35                       | 13 898                         | 728                                        | None          |
| OP-9                                  | 2001          | Male               | White             | Yes | Positive | 4.8                                        | 48                       | 350                            | 540                                        | None          |
| <b>Group-2 (Early, n=9)</b>           |               |                    |                   |     |          | 3.1 [2.4-3.3]                              | 35 [34-43]               | 45289 [21494-62155]            | 528 [416-592]                              |               |
| OP-10                                 | 1999          | Male               | White             | Yes | Positive | 3.2                                        | 29                       | 45 289                         | 552                                        | None          |
| OP-11                                 | 1999          | Male               | White             | Yes | Positive | 3.8                                        | 45                       | 64 626                         | 528                                        | None          |
| OP-12                                 | 1999          | Male               | White             | Yes | Positive | 2.4                                        | 38                       | 572                            | 592                                        | None          |
| OP-13                                 | 1999          | Male               | White             | Yes | Positive | 3.6                                        | 25                       | 2 083                          | 1 260                                      | None          |
| OP-14                                 | 1999          | Male               | White             | Yes | Positive | 2.4                                        | 43                       | 63 321                         | 416                                        | None          |
| OP-15                                 | 1999          | Male               | White             | Yes | Positive | -                                          | 45                       | 24 877                         | 312                                        | None          |
| OP-16                                 | 2000          | Male               | Latino / Hispanic | Yes | Positive | 3.2                                        | 34                       | 50 600                         | 300                                        | None          |
| OP-17                                 | 2000          | Male               | White             | Yes | Positive | 2.0                                        | 34                       | 62 155                         | 690                                        | None          |
| OP-18                                 | 2001          | Male               | Mixed Race        | Yes | Positive | 3.0                                        | 35                       | 21 494                         | 513                                        | None          |
| <b>Group-3 (Early, n=9)</b>           |               |                    |                   |     |          | 2.8 [2.4-3.3]                              | 38 [34-42]               | 47050 [9884-75452]             | 592 [480-837]                              |               |
| OP-19                                 | 1998          | Male               | White             | Yes | Positive | 2.4                                        | 53                       | 47 050                         | 595                                        | None          |
| OP-20                                 | 2000          | Male               | Latino / Hispanic | Yes | Positive | 2.8                                        | 29                       | 73 698                         | 475                                        | None          |
| OP-21                                 | 2000          | Male               | White             | Yes | Negative | 0.8                                        | 49                       | 9 884                          | 837                                        | None          |
| OP-22                                 | 2001          | Female             | White             | No  | Positive | -                                          | 34                       | 33 837                         | 592                                        | None          |
| OP-23                                 | 2001          | Male               | White             | Yes | Positive | 2.9                                        | 34                       | 2 380                          | 930                                        | None          |
| OP-24                                 | 2001          | Male               | White             | Yes | Positive | 2.4                                        | 36                       | 6 363                          | 1 404                                      | None          |
| OP-25                                 | 2001          | Male               | White             | Yes | Positive | -                                          | 39                       | 200 538                        | 330                                        | None          |
| OP-26                                 | 2001          | Male               | White             | Yes | Positive | 3.6                                        | 38                       | 75 452                         | 480                                        | None          |
| OP-27                                 | 2002          | Male               | White             | Yes | Positive | 7.1                                        | 42                       | 87 864                         | 494                                        | None          |
| <b>CHRONIC</b>                        |               |                    |                   |     |          | 11.6 [9.1-14.3]                            | 37 [35-43.5]             | 37657 [2496-81922]             | 444 [359-743]                              |               |
| <b>Group-1 (Late, n=9)</b>            |               |                    |                   |     |          | 14.1 [9.5-14.3]                            | 37 [35-41]               | 1536 [883-2386]                | 702 [481-805]                              |               |
| OP-1                                  | 1999          | Male               | AfricanAmerican   | Yes | Positive | 16.0                                       | 44                       | 1 536                          | 481                                        | None          |
| OP-2                                  | 2001          | Male               | Mixed Race        | Yes | Positive | 14.3                                       | 39                       | 93                             | 966                                        | None          |
| OP-3                                  | 2001          | Male               | White             | Yes | Positive | 14.3                                       | 36                       | 883                            | 693                                        | None          |
| OP-4                                  | 2001          | Male               | Mixed Race        | Yes | Positive | 14.1                                       | 37                       | 1 168                          | 805                                        | None          |
| OP-5                                  | 2001          | Male               | White             | Yes | Positive | 9.1                                        | 41                       | 127                            | 480                                        | None          |
| OP-6                                  | 2001          | Male               | White             | Yes | Positive | 8.8                                        | 31                       | 2 606                          | 760                                        | None          |
| OP-7                                  | 2002          | Male               | White             | Yes | Positive | 14.7                                       | 29                       | 3 363                          | 882                                        | None          |
| OP-8                                  | 2001          | Male               | White             | Yes | Positive | 9.5                                        | 35                       | 2 212                          | 702                                        | None          |
| OP-9                                  | 2002          | Male               | White             | Yes | Positive | 10.6                                       | 49                       | 2 386                          | 385                                        | None          |
| <b>Group-2 (Late, n=9)</b>            |               |                    |                   |     |          | 13.4 [10.6-14.3]                           | 35 [35-44]               | 82641 [53486-181901]           | 308 [253-437]                              |               |
| OP-10                                 | 1999          | Male               | White             | Yes | Positive | 11.2                                       | 29                       | 181 901                        | 253                                        | None          |
| OP-11                                 | 2000          | Male               | White             | Yes | Positive | 8.3                                        | 45                       | 82 641                         | 304                                        | None          |
| OP-12                                 | 2000          | Male               | White             | Yes | Positive | 14.1                                       | 39                       | 206 621                        | 308                                        | None          |
| OP-13                                 | 2000          | Male               | White             | Yes | Positive | 14.8                                       | 26                       | 97 084                         | 756                                        | None          |
| OP-14                                 | 2000          | Male               | White             | Yes | Positive | 12.9                                       | 44                       | 478 000                        | 338                                        | None          |
| OP-15                                 | 2000          | Male               | White             | Yes | Positive | -                                          | 46                       | 39 482                         | 242                                        | None          |
| OP-16                                 | 2001          | Male               | Latino / Hispanic | Yes | Positive | 14.0                                       | 35                       | 53 486                         | 225                                        | None          |
| OP-17                                 | 2002          | Male               | White             | Yes | Positive | 18.3                                       | 35                       | 25 922                         | 437                                        | None          |
| OP-18                                 | 2002          | Male               | Mixed Race        | Yes | Positive | 8.8                                        | 35                       | 63 482                         | 450                                        | None          |
| <b>Group-3 (Late, n=9)</b>            |               |                    |                   |     |          | 9.6 [8.4-10.9]                             | 38 [36-43]               | 40735 [34823-81203]            | 426 [404-707]                              |               |
| OP-19                                 | 1998          | Male               | White             | Yes | Positive | 5.5                                        | 53                       | 40 735                         | 408                                        | None          |
| OP-20                                 | 2001          | Male               | Latino / Hispanic | Yes | Positive | 9.0                                        | 29                       | 37 657                         | 350                                        | None          |
| OP-21                                 | 2001          | Male               | White             | Yes | Negative | 7.9                                        | 50                       | 34 823                         | 780                                        | None          |
| OP-22                                 | 2002          | Female             | White             | No  | Positive | -                                          | 36                       | 81 203                         | 420                                        | None          |
| OP-23                                 | 2002          | Male               | White             | Yes | Positive | 19.7                                       | 35                       | 33 367                         | 928                                        | None          |
| OP-24                                 | 2002          | Male               | White             | Yes | Positive | 9.8                                        | 37                       | 41 401                         |                                            | None          |
| OP-25                                 | 2002          | Male               | White             | Yes | Positive | -                                          | 39                       | 122 891                        | 432                                        | None          |
| OP-26                                 | 2002          | Male               | White             | Yes | Positive | 9.6                                        | 38                       | 150 715                        | 682                                        | None          |
| OP-27                                 | 2002          | Male               | White             | Yes | Positive | 12.0                                       | 43                       | 21 500                         | 390                                        | None          |
| <b>Study D (n=20, SCOPE cohort)</b>   |               |                    |                   |     |          |                                            |                          |                                |                                            |               |
|                                       |               |                    |                   |     |          | <b>Years</b>                               |                          |                                |                                            |               |
| <b>Controllers CD4&gt;500 (n=9)</b>   |               |                    |                   |     |          | 19 [18-21]                                 | 47 [46-48]               | 40 [40-250]                    | 701 [625-1000]                             |               |
| SC-126                                | 2007          | Male               | White             | Yes | Positive | 11                                         | 45                       | 1 795                          | 597                                        | None          |
| SC-127                                | 2007          | Male               | Hispanic/Latino   | Yes | Positive | 19                                         | 42                       | 250                            | 701                                        | None          |
| SC-10                                 | 2007          | Male               | African American  | Yes | Positive | 18                                         | 46                       | 774                            | 633                                        | None          |
| SC-128                                | 2007          | Male               | White             | Yes | Positive | 20                                         | 54                       | <40                            | 823                                        | None          |
| SC-129                                | 2007          | Male               | Native American   | No  | Positive | 22                                         | 47                       | <40                            | 518                                        | None          |
| SC-130                                | 2007          | Male               | White             | Yes | Positive | 21                                         | 52                       | <40                            | 1 311                                      | None          |
| SC-131                                | 2007          | Male               | White             | Yes | Positive | 22                                         | 47                       | <40                            | 1 000                                      | None          |
| SC-89                                 | 2007          | Male               | African American  | Yes | Positive | 19                                         | 48                       | 182                            | 625                                        | None          |
| SC-2                                  | 2007          | M to F Transgender | African American  | No  | Positive | 16                                         | 47                       | <40                            | 1 507                                      | None          |
| <b>Noncontrollers (n=11)</b>          |               |                    |                   |     |          | 11 [6-14]                                  | 42 [40-48]               | 24734 [21257-44622]            | 253 [210-402]                              |               |
| SC-30                                 | 2007          | Male               | African American  | Yes | Positive | 15                                         | 41                       | 17 600                         | 196                                        | None          |
| SC-132                                | 2007          | Male               | White             | Yes | Positive | 1                                          | 59                       | 32 944                         | 221                                        | None          |
| SC-133                                | 2007          | M to F Transgender | African American  | Yes | Positive | 11                                         | 46                       | 140 000                        | 211                                        | None          |
| SC-134                                | 2007          | Male               | African American  | Yes | Positive | 0                                          | 42                       | 56 299                         | 206                                        | None          |
| SC-135                                | 2007          | Intersex           | Mixed Race        | Yes | Positive | 18                                         | 46                       | 20 420                         | 643                                        | None          |
| SC-46                                 | 2007          | Male               | White             | Yes | Positive | 7                                          | 41                       | 24 734                         | 253                                        | None          |
| SC-136                                | 2007          | Male               | White             | Yes | Positive | 21                                         | 49                       | 21 523                         | 415                                        | None          |
| SC-137                                | 2007          | Male               | African American  | Yes | Positive | 11                                         | 36                       | 20 991                         | 354                                        | None          |
| SC-138                                | 2007          | Male               | Hispanic/Latino   | Yes | Positive | 6                                          | 38                       | 24 729                         | 389                                        | None          |
| SC-139                                | 2007          | Male               | White             | Yes | Positive | 5                                          | 39                       | 25 725                         | 673                                        | None          |
| SC-140                                | 2007          | Male               | White             | Yes | Positive | 12                                         | 50                       | 91 199                         | 208                                        | None          |



**Table S2. Antibody panels for multiparameter flow cytometry.**

| Fluorescence dye     | Panel 1: Activation/Subpop T cells |             |             |          | Panel 2: T regs |            |             |          |
|----------------------|------------------------------------|-------------|-------------|----------|-----------------|------------|-------------|----------|
|                      | Antigen                            | Clone       | Manufact.   | Dilution | Antigen         | Clone      | Manufact.   | Dilution |
| Pacific Blue         | CD3                                | SP34-2      | BD          | 100      | CD3             | SP34-2     | BD          | 100      |
| qDot655              | CD4                                | 19Thy-5D7   | NIH         | 100      | CD4             | 19Thy-5D7  | NIH         | 100      |
| FITC                 | Ki67                               | B56         | BD          | 25       | Ki67            | B56        | BD          | 25       |
| PE                   | Tim3 or MHC-I                      | 344823/W632 | R&D/Dako    | 50\100   | CD127           | hIL-7R-M21 | BD          | 25       |
| PE-Texas Red (ECD)   | CD45RA                             | 2H4         | Coulter     | 50       | CD45RA          | 2H4        | Coulter     | 50       |
| Amcyan (AQUA)        | Live/Dead                          |             | Invitrogen  | 300      | Live/Dead       |            | Invitrogen  | 300      |
| APC/Alexa647         | CD38                               | HIT2        | BD          | 25       | FoxP3           | PCH101     | eBioscience | 20       |
| PE-Cy5.5             | CD8                                | 3b5         | Invitroeqn  | 200      | CD8             | 3b5        | Invitroeqn  | 200      |
| PE-Cy7               | HLA-DR                             | L243        | BD          | 100      | HLA-DR          | L243       | BD          | 100      |
| APC-Cy7/APC-Alexa750 | CD27                               | O323        | eBioscience | 100      | CD27            | O323       | eBioscience | 100      |
| Alexa700             | CD25                               | BC96        | Biologend   | 100      | CD25            | BC96       | Biologend   | 100      |

| Fluorescence dye     | Panel CFC/Th17 (Study D) |               |             |          | Panel CFC/Th17 (Studies B and C) |             |             |          |
|----------------------|--------------------------|---------------|-------------|----------|----------------------------------|-------------|-------------|----------|
|                      | Antigen                  | Clone         | Manufact.   | Dilution | Antigen                          | Clone       | Manufact.   | Dilution |
| Pacific Blue         | IFN $\gamma$             | 4S.B3         | eBioscience | 50       | CD3                              | SP34-2      | BD          | 100      |
| qDot655              |                          |               |             |          | CD4                              | 19Thy-5D7   | NIH         | 100      |
| FITC/Alexa488        | MIP1 $\beta$             | 25.3          | R&D         | 50       | MIP1 $\beta$                     | 25.3        | R&D         | 50       |
| PE                   | IL-17                    | eBio64CAP17   | eBioscience | 50       | IL-17                            | eBio64CAP17 | eBioscience | 50       |
| PE-Texas Red (ECD)   | CD4                      | SFC112T4011   | Coulter     | 75       | CD45RA                           | 2H4         | Coulter     | 50       |
| Amcyan               | Live/Dead                |               | Invitrogen  | 300      | Live/Dead                        |             | Invitrogen  | 300      |
| APC/Alexa647         | IL-22 or IL-21           | 142928/3A3-N2 | R&D/eBiosc. | 50       | IL-22                            | 142928      | R&          | 50       |
| PE-Cy5.5             | CD8                      | 3b5           | Invitrogen  | 200      | CD8                              | 3b5         | Invitrogen  | 200      |
| PE-Cy7               | TNF $\alpha$             | B27           | BD          | 100      | IFN $\gamma$                     | B27         | BD          | 100      |
| APC-Cy7/APC-Alexa750 | CD3                      | SP34-2        | BD          | 100      | CD27                             | O323        | eBioscience | 100      |
| Alexa700             | IL-2                     | MQ1-17H12     | Biologend   | 100      | IL-2                             | MQ1-17H12   | Biologend   | 100      |
